# Supplementary material for: Intrinsic structural features of coordination polymers make an impact on dye selectivity
Source: Royal Society of Chemistry journal article supplement (doi:10.1039/d1ce00481f), 2021-01-01
Supplement: d1ce00481f1.pdf [file d1ce00481f1.pdf]

## Supporting information

### Intrinsic Structural Features of Coordination Polymers Make Impact on Dye Selectivity

Rinki Brahma, Jubaraj B. Baruah\*

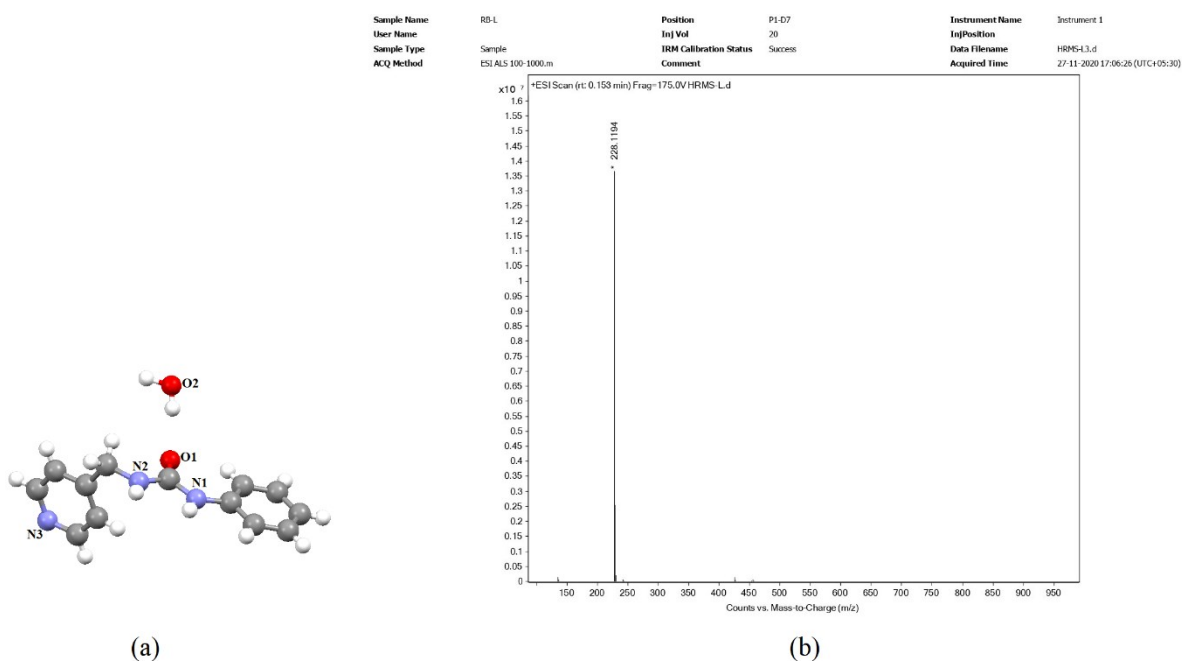

Figure 1S: (a) The structure of 1-phenyl-3-((pyridin-4-yl)methyl)urea monohydrate; (b) ESI-mass of 1-phenyl-3-((pyridin-4-yl)methyl)urea.

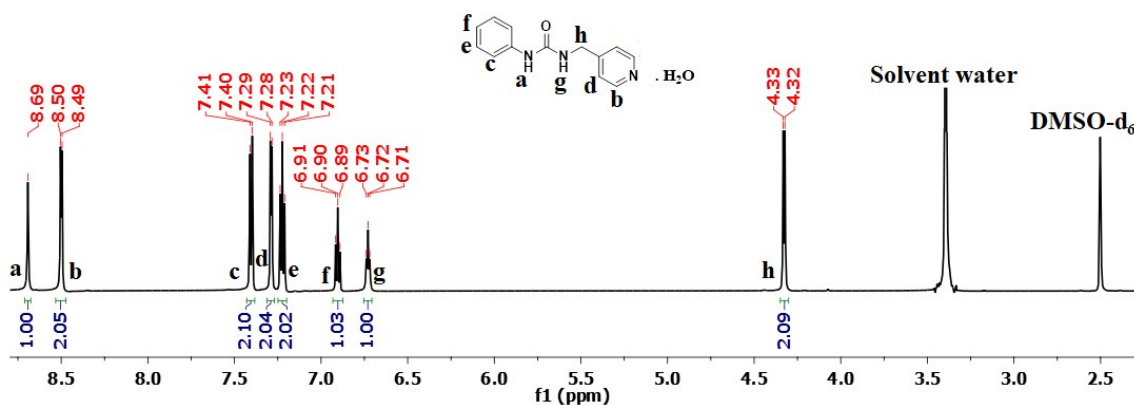

Figure 2S:  $^1H$ -NMR (600 MHz, DMSO- $d_6$ ) spectra of L.H<sub>2</sub>O.

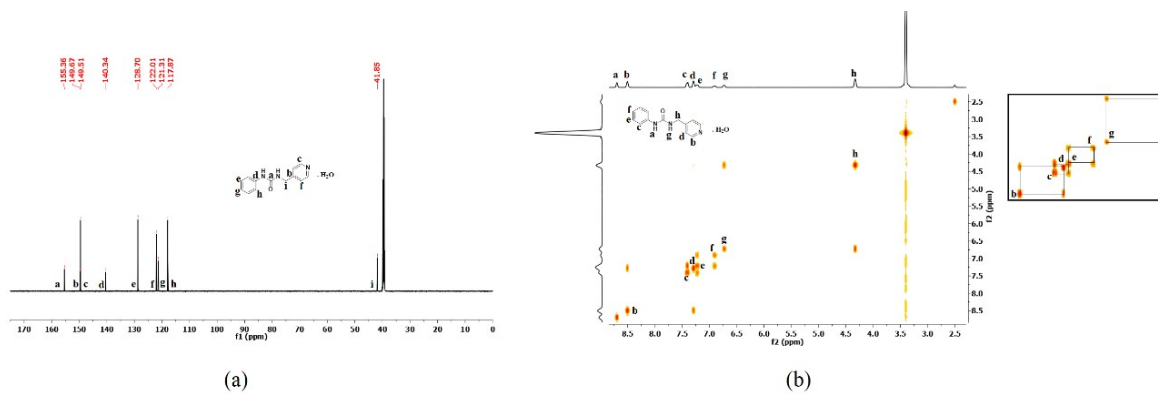

Figure 3S: (a)  $^{13}\text{C}$ -NMR (150 MHz, DMSO- $d_6$ ) spectrum (b) 2D HOMO-COSY  $^1\text{H}$ -NMR spectra (600 MHz, DMSO- $d_6$ ) of L.H $_2$ O.

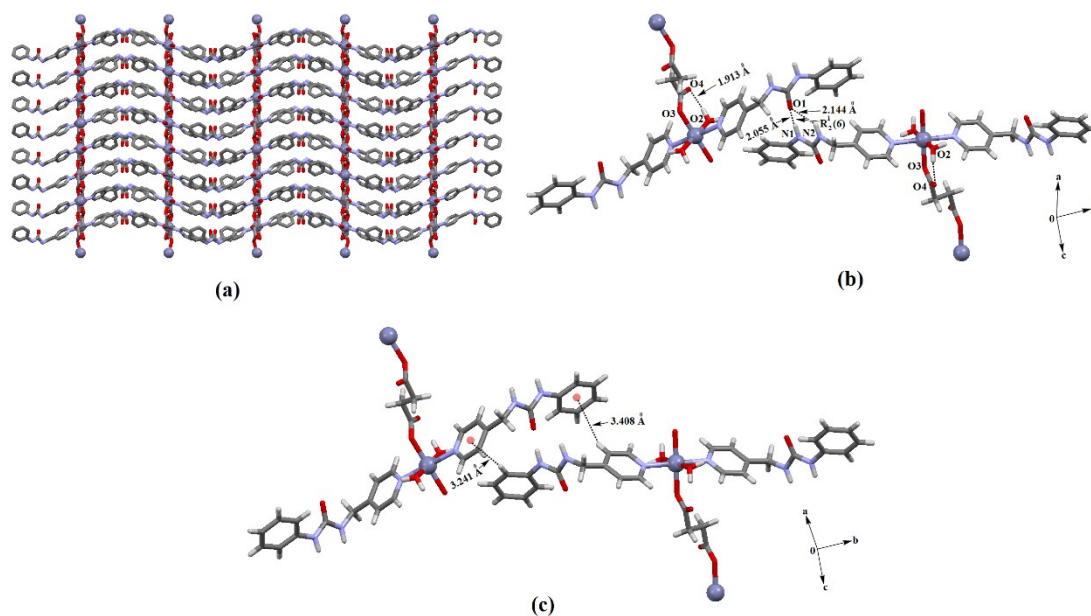

Figure 4S: Hydrogen bonded self-assembly of CP4 (a) packing diagram along a-axis, (b) showing N1-H-O1, N2-H-O1, O2-H-O4 hydrogen bonds, (c) C-H- $\pi$  interactions.

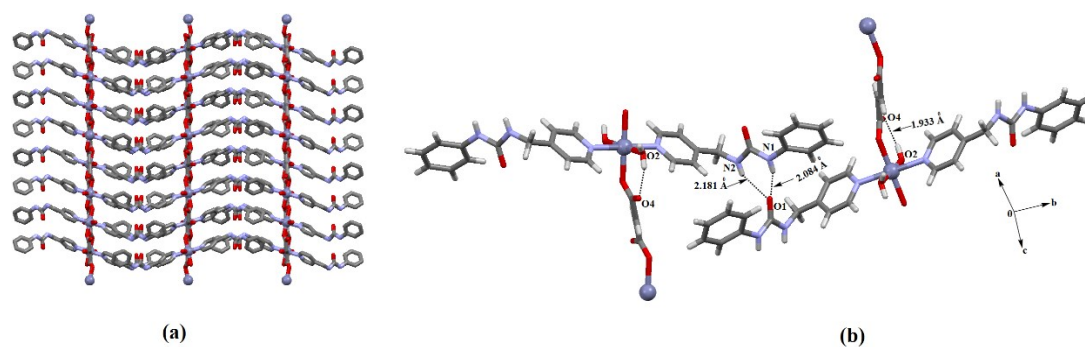



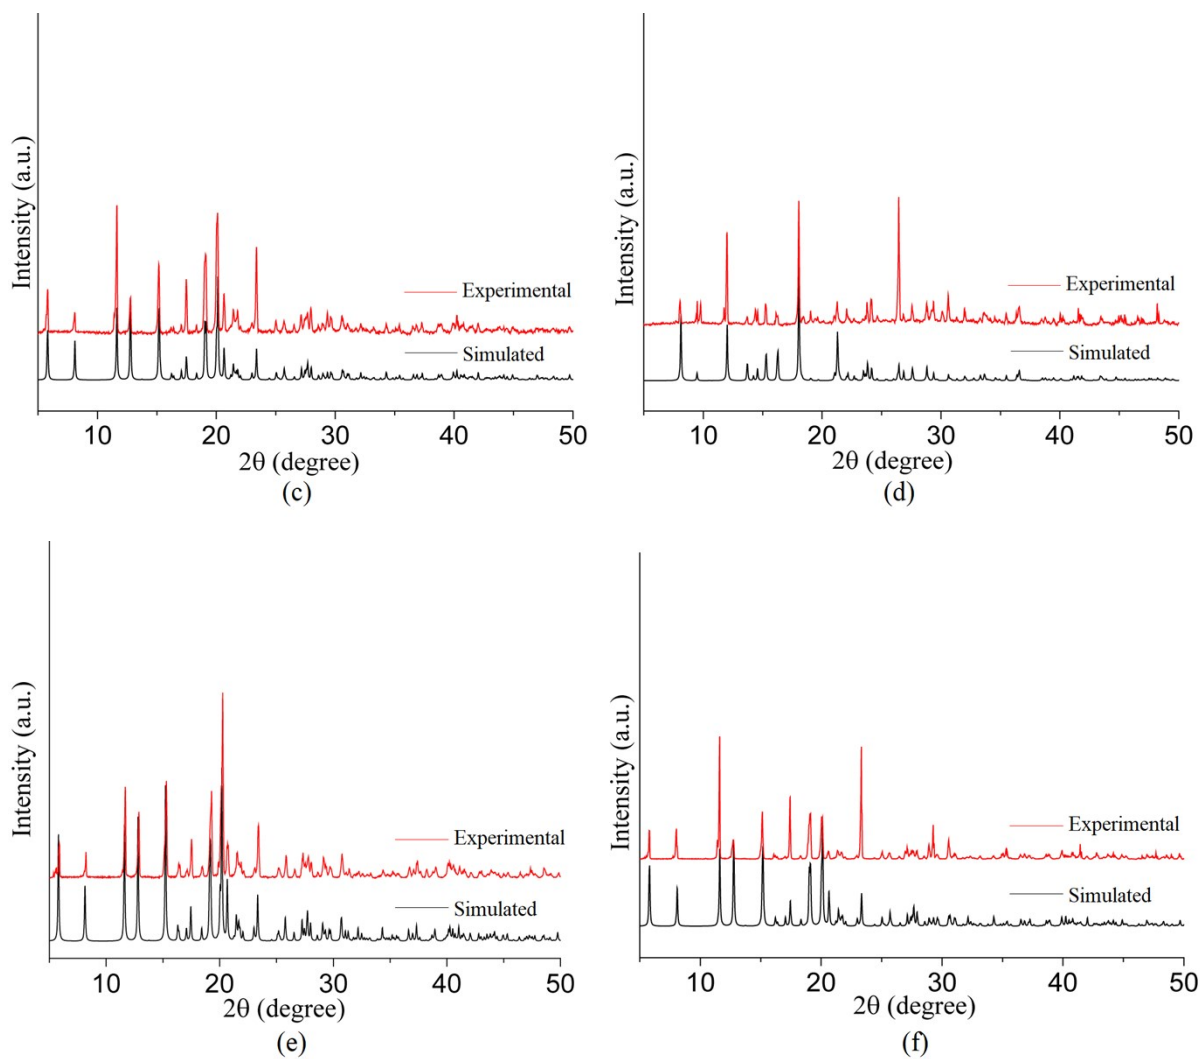

Figure 7S: PXR D patterns of (a)  $L.H_2O$ , (b) CP1, (c) CP2, (d) CP3, (e) CP4 and (f) CP5. Simulated patterns generated from crystallographic information files (Red = Experimental, Black = Simulated).

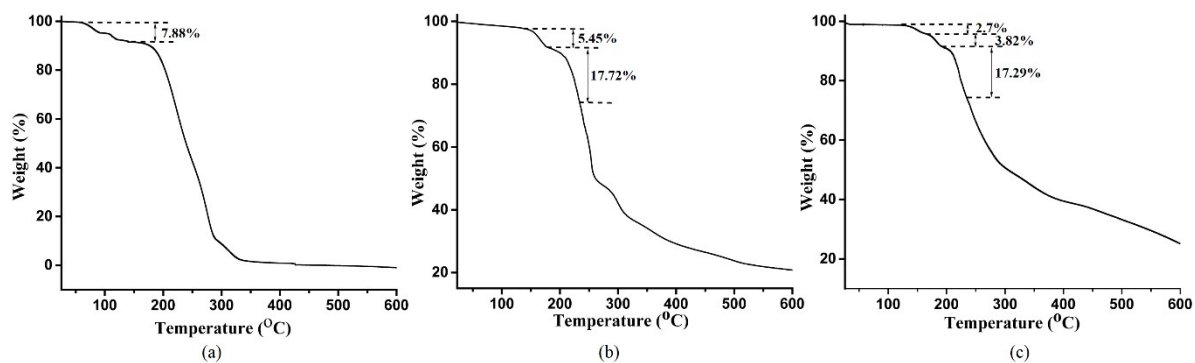

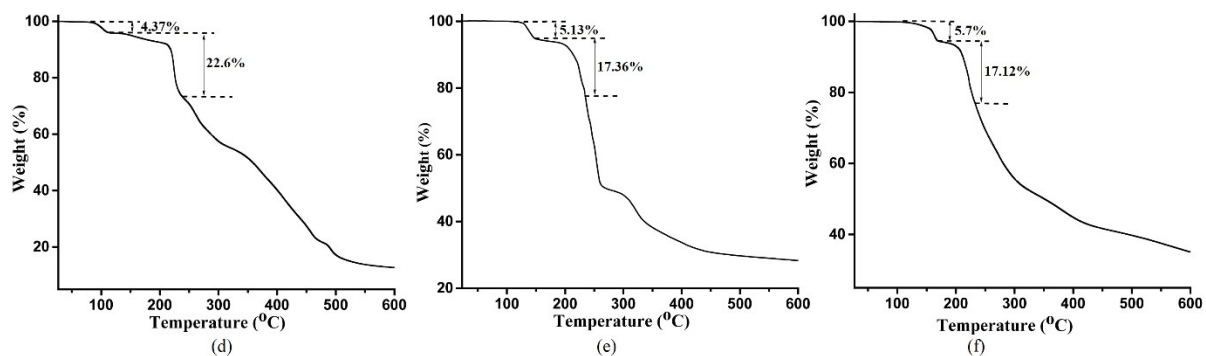

Figure 8S: Thermogram of (a)  $L \cdot H_2O$ , (b) CP1 (c) CP2 (d) CP3 (e) CP4 (f) CP5 (heating rate  $10^\circ C/min$  under nitrogen atmosphere).

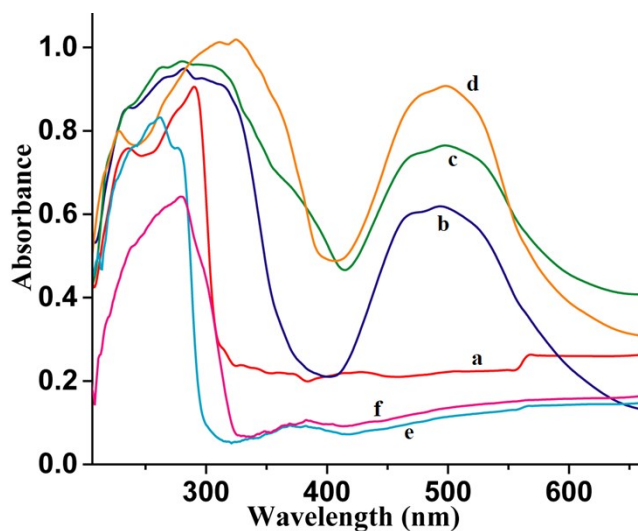

Figure 9S: UV-Vis spectra solid samples of (a)  $L \cdot H_2O$  ( $\lambda_{max} = 291$  nm), (b) CP1 ( $\lambda_{max} = 282$  nm, 494 nm), (c) CP2 ( $\lambda_{max} = 282$  nm, 498 nm), (d) CP3 ( $\lambda_{max} = 324$  nm, 498 nm), (e) CP4 ( $\lambda_{max} = 262$  nm, 368 nm), (f) CP5 ( $\lambda_{max} = 281$  nm, 384 nm).

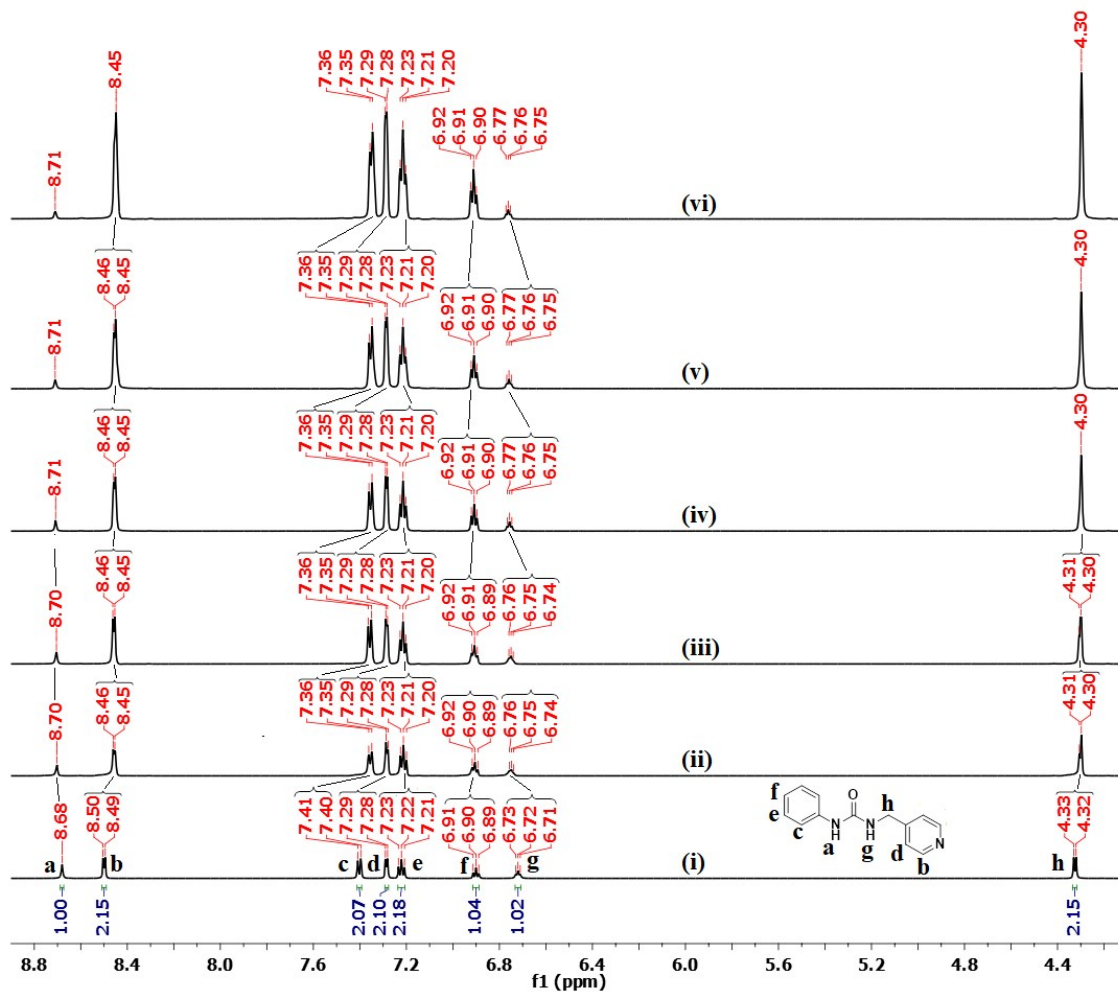

Figure 10S:  $^1\text{H-NMR}$  (600 MHz) spectra of **L** in (i) DMSO- $d_6$  and with different fractions of  $\text{D}_2\text{O}$  (ii) 10% (iii) 30% (iv) 60% (v) 70% (vi) 90%.

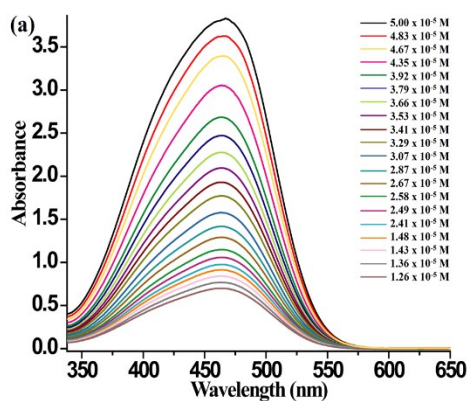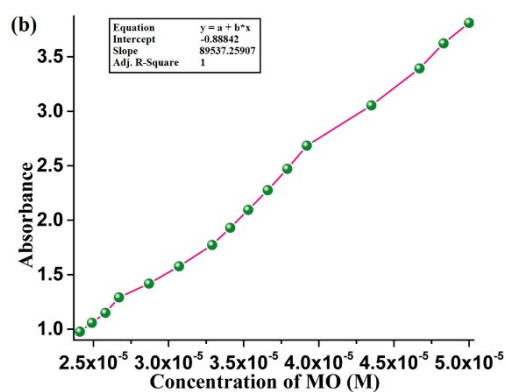

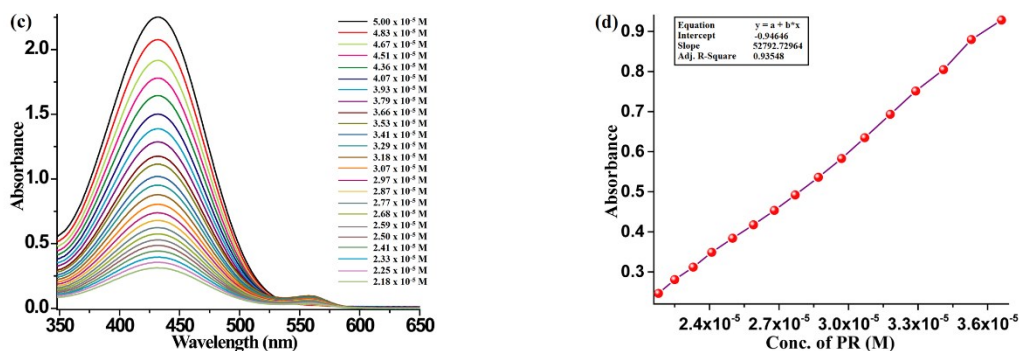

Figure 11S: Calibration plots for Methyl orange ( $\lambda_{\max} = 464 \text{ nm}$ ) and Phenol red ( $\lambda_{\max} = 432 \text{ nm}$ ) (a, c) by UV-Vis spectra in an aqueous solution and their fitting of absorbance vs concentration of respective dye values (b, d) respectively.

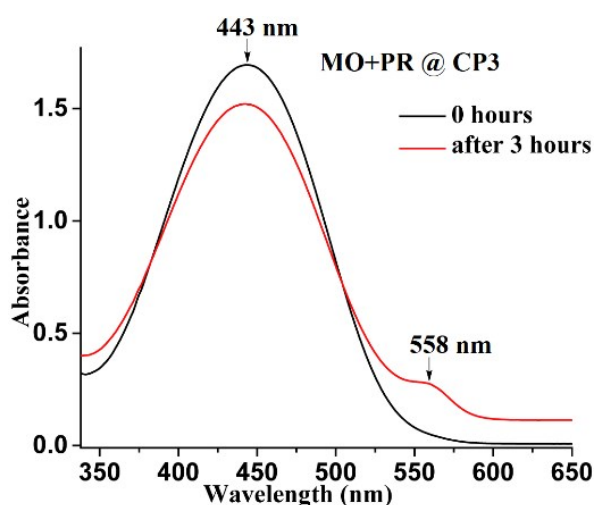

Figure 12S: Dye adsorption with a mixture of MO and PR by CP3 after 3 hours.

Table 1S: The absorbance and removal of dyes by coordination polymers:

| Coordination polymer (CP) | Amount of Methyl orange dye adsorbed ( $q_e, \text{mg g}^{-1}$ ) |
|---------------------------|------------------------------------------------------------------|
| CP1                       | 1.320                                                            |
| CP2                       | 1.369                                                            |
| CP3                       | 1.986                                                            |
| CP4                       | 0.867                                                            |
| CP5                       | 0.731                                                            |
| CP6                       | 1.309                                                            |
| Coordination polymer (CP) | Amount of Phenol Red dye adsorbed ( $q_e, \text{mg g}^{-1}$ )    |
| CP1                       | 0.632                                                            |
| CP2                       | 0.714                                                            |
| CP3                       | 0.100                                                            |

|     |       |
|-----|-------|
| CP4 | 0.378 |
| CP5 | 0.194 |
| CP6 | 0.289 |

| Coordination polymer (CP) | Removal percentage of Methyl orange dye (%) |
|---------------------------|---------------------------------------------|
| CP1                       | 48.4                                        |
| CP2                       | 50.2                                        |
| CP3                       | 72.83                                       |
| CP4                       | 31.8                                        |
| CP5                       | 26.8                                        |
| CP6                       | 48                                          |

| Coordination polymer (CP) | Removal percentage of Phenol Red dye (%) |
|---------------------------|------------------------------------------|
| CP1                       | 21.4                                     |
| CP2                       | 24.2                                     |
| CP3                       | 3.4                                      |
| CP4                       | 12.8                                     |
| CP5                       | 6.6                                      |
| CP6                       | 9.8                                      |

Table 2S: Hydrogen bond parameters of ligand and coordination polymers **1-5**.

| Compound                | D-H...A                                  | d <sub>D-H</sub> (Å) | d <sub>H...A</sub> (Å) | d <sub>D...A</sub> (Å) | ∠D-H...A (°) |
|-------------------------|------------------------------------------|----------------------|------------------------|------------------------|--------------|
| <b>L.H<sub>2</sub>O</b> | N(1)-H(1A) ...O(2) [x,y,z]               | 0.93 (5)             | 2.01 (5)               | 2.924 (5)              | 166 (4)      |
|                         | N(2)-H(2A) ...O(2) [x,y,z]               | 0.83 (5)             | 2.29 (5)               | 2.980 (5)              | 141 (5)      |
|                         | O(2)-H(2B) ...O(1) [1/2+x,1/2-y,z]       | 0.87 (5)             | 1.95 (5)               | 2.819 (5)              | 174 (4)      |
|                         | O(2)-H(2C) ...N(3) [1/2-x,1/2+y,-1/2+z]  | 0.98 (7)             | 1.91 (7)               | 2.876 (5)              | 169 (6)      |
|                         | C(5)-H(5)...O(1) [x,y,z]                 | 0.929                | 2.290                  | 2.887 (6)              | 121          |
|                         | C(10)-H(10)...N(2) [x,y,z]               | 0.93                 | 2.541                  | 2.873 (5)              | 101          |
|                         | C(12)-H(12)...O(1) [-x,-y,-1/2+z]        | 0.929                | 4.774                  | 4.892 (6)              | 92           |
| <b>CP1</b>              | N(1)-H(1A) ...O(1) [x,1/2-y,-1/2+z]      | 0.85 (2)             | 2.03 (2)               | 2.835 (4)              | 160 (3)      |
|                         | N(2)-H(2A) ...O(1) [x,1/2-y,-1/2+z]      | 0.84 (4)             | 2.12 (4)               | 2.876 (3)              | 149 (4)      |
|                         | O(2)-H(2B) ...O(4) [1/2-x,y,1/2+z]       | 0.820                | 1.870                  | 2.674 (3)              | 166          |
|                         | O(2)-H(2C) ...O(4) [x,y,z]               | 0.84 (3)             | 1.89 (3)               | 2.675 (3)              | 156 (3)      |
|                         | C(10)-H(10) ...N(2) [x,y,z]              | 0.929                | 2.603                  | 2.906 (4)              | 100          |
| <b>CP2</b>              | N(1)-H(1A) ...O(1) [1/2-x,y,1/2+z]       | 0.82 (4)             | 2.05 (4)               | 2.829 (3)              | 158(4)       |
|                         | N(2)-H(2A) ...O(1) [1/2-x,y,1/2+z]       | 0.85 (4)             | 2.10 (4)               | 2.870 (3)              | 151 (4)      |
|                         | O(2)-H(2B) ...O(4) [x,y,z]               | 0.821                | 1.935                  | 2.688 (3)              | 152          |
|                         | O(2)-H(2C) ...O(4) [x, 1/2-y,-1/2+z]     | 0.82 (5)             | 1.84 (5)               | 2.662 (3)              | 178 (5)      |
|                         | C(10)-H(10) ...N(2) [x,y,z]              | 0.929                | 2.565                  | 2.878 (5)              | 100          |
| <b>CP3</b>              | N(1)-H(1A) [x,y,z]                       | 0.81 (2)             | -                      | -                      | -            |
|                         | N(2)-H(2A) ...O(4) [-1/2+x,3/2-y,-1/2+z] | 0.83 (2)             | 2.10 (2)               | 2.922 (2)              | 167 (2)      |
|                         | O(2)-H(2B) ...O(1) [x, 1+y, z]           | 0.820                | 2.034                  | 2.753 (2)              | 146          |
|                         | O(2)-H(2C) ...O(4) [1-x,2-y,1-z]         | 0.82 (2)             | 1.86 (2)               | 2.669 (2)              | 166 (2)      |
|                         | C(5)-H(5) ...O(1) [x,y,z]                | 0.931                | 2.263                  | 2.863 (4)              | 121          |
|                         | C(8)-H(8A) ...O(1) [x,y,z]               | 0.970                | 2.449                  | 2.784 (2)              | 100          |
|                         | C(10)-H(10) ...N(2) [x,y,z]              | 0.931                | 2.586                  | 2.904 (2)              | 101          |



|            |                                      |          |          |           |         |
|------------|--------------------------------------|----------|----------|-----------|---------|
| <b>CP4</b> | N(1)-H(1A) ...O(1) [x,1/2-y,-1/2+z]  | 0.860    | 2.058    | 2.830 (3) | 149     |
|            | N(2)-H(2A) ...O(1) [x,1/2-y,-1/2+z]  | 0.860    | 2.143    | 2.874 (3) | 143     |
|            | O(2)-H(2B) ...O(4) [1-x,-y,1-z]      | 0.850    | 1.907    | 2.676 (3) | 150     |
|            | O(2)-H(2C) [x,y,z]                   | 1.008    | -        | -         | -       |
|            | C(10)-H(10) ...N(2) [x,y,z]          | 0.930    | 2.585    | 2.891 (3) | 100     |
| <b>CP5</b> | N(1)-H(1A) ...O(1) [x,1/2-y,-1/2+z]  | 0.79 (4) | 2.08 (4) | 2.834 (3) | 157 (3) |
|            | N(2) -H(2A) ...O(1) [x,1/2-y,-1/2+z] | 0.77 (3) | 2.18 (3) | 2.870 (3) | 149 (3) |
|            | O(2)-H(2B)...O(4) [x,y,z]            | 0.820    | 1.933    | 2.685 (3) | 152     |
|            | O(2)-H(2C)...O(4) [3/2-x,y,1/2+z]    | 0.79 (4) | 1.87 (4) | 2.668 (2) | 176 (4) |
|            | C(10)-H(10)...N(2) [x,y,z]           | 0.930    | 2.566    | 2.878 (4) | 100     |
